# Supplementary material for: Dengue Virus Infection Perturbs Lipid Homeostasis in Infected Mosquito Cells
Source: PubMed Central journal article supplement (PMC3310792; doi:10.1371/journal.ppat.1002584), 2012-03-22
Supplement: ppat.1002584.s004.pdf [file ppat.1002584.s004.pdf]

**Supplementary Table 1**

| Treatment (P)           | Exact Mass  | [M+H] <sup>+</sup> | NET         | Total Carbon/D  | LM_ID        | FORMULA    | PPM Error   | Fold Den /Mock |
|-------------------------|-------------|--------------------|-------------|-----------------|--------------|------------|-------------|----------------|
| <b>Mock vs Den 36hr</b> |             |                    |             |                 |              |            |             |                |
| 5.70E-04                | 493.319547  | 494.327367         | 0.202519899 | LPC 16:1        | LMGP01050021 | C24H48NO7P | 5.568429861 | 2.84633556     |
| 4.70E-04                | 495.3351819 | 496.3430019        | 0.225881771 | LPC 16:0        | LMGP01050018 | C24H50NO7P | 5.515285744 | 5.70916973     |
| 1.42E-02                | 507.3713078 | 508.3791278        | 0.259450505 | LPC p-18:0 or O | LMGP01070009 | C26H54NO6P | 4.863917146 | 3.075249133    |
| 1.27E-03                | 521.3509477 | 522.3587677        | 0.222334181 | LPC 18:1        | LMGP01050030 | C26H52NO7P | 5.462185438 | 2.915070791    |
| 1.25E-02                | 689.5401977 | 690.5480177        | 0.397908715 | PC O-30:1       | LMGP01020014 | C38H76NO7P | 6.232742922 | 2.081571725    |
| 2.44E-03                | 717.5716173 | 718.5794373        | 0.398614135 | PC O-32:1       | LMGP01020016 | C40H80NO7P | 6.155939123 | 1.984340482    |
| 4.15E-02                | 719.5876173 | 720.5954373        | 0.486556448 | PC O-32:0       | LMGP01020015 | C40H82NO7P | 6.625088411 | 1.658492354    |
| 5.19E-03                | 745.6029093 | 746.6107293        | 0.453108572 | PC (16:0e/18:1; | LMGP01020003 | C42H84NO7P | 5.913772627 | 1.783402315    |
| 2.91E-02                | 747.619111  | 748.626931         | 0.575690701 | PC O-34:0       | LMGP01020086 | C42H86NO7P | 6.635775955 | 4.303059026    |
| 1.16E-02                | 773.6346917 | 774.6425117        | 0.524861954 | PC (16:0p/20:0; | LMGP01020052 | C44H88NO7P | 6.32305012  | 2.092810706    |
| 1.45E-02                | 779.5511791 | 780.5589991        | 0.321648936 | PC 36:5         | LMGP01011305 | C44H78NO8P | 6.053648169 | 1.944815964    |
| 7.47E-03                | 781.5666768 | 782.5744968        | 0.355787216 | PC 36:4         | LMGP01011056 | C44H80NO8P | 5.843169649 | 1.890537453    |
| 0.01770563              | 787.6138126 | 788.6216326        | 0.477367579 | PC 36:1         | LMGP01010761 | C44H86NO8P | 6.034211948 | 1.889083063    |
| 9.52E-03                | 803.5515391 | 804.5593591        | 0.30519687  | PC 38:7         | LMGP01010696 | C46H78NO8P | 6.320854179 | 1.872550202    |
| 6.41E-02                | 805.5671035 | 806.5749235        | 0.339317721 | PC 38:6         | LMGP01010649 | C46H80NO8P | 6.19877715  | 2.029369367    |
| 5.68E-03                | 807.5827718 | 808.5905918        | 0.350068809 | PC 38:5         | LMGP01010644 | C46H82NO8P | 6.20596585  | 1.842116429    |
| 4.68E-02                | 815.6453964 | 816.6532164        | 0.557540948 | PC 38:1         | LMGP01010786 | C46H90NO8P | 6.174780267 | 1.702561539    |
| 2.78E-02                | 453.288309  | 454.296129         | 0.225708132 | LPE 16:0        | LMGP02050002 | C21H44NO7P | 6.196977402 | 2.335860578    |
| 9.27E-03                | 479.3038817 | 480.3117017        | 0.224633514 | LPE 18:1        | LMGP02050004 | C23H46NO7P | 5.699339549 | 2.227590249    |
| 1.47E-02                | 663.4881255 | 664.4959455        | 0.383211376 | PE 30:0         | LMGP02010302 | C35H70NO8P | 6.428943125 | 0.830705785    |
| 2.45E-02                | 691.5195301 | 692.5273501        | 0.444906928 | PE 32:0         | LMGP02010017 | C37H74NO8P | 6.319601149 | 0.700600412    |
| 4.58E-02                | 715.5199495 | 716.5277695        | 0.364265384 | PE 34:2         | LMGP02010042 | C39H74NO8P | 6.693778508 | 1.425745712    |
| 6.85E-02                | 745.5668685 | 746.5746885        | 0.482835154 | PE 36:1         | LMGP02010026 | C41H80NO8P | 6.382432713 | 1.469935504    |
| 4.13E-02                | 717.5356843 | 718.5435043        | 0.42173318  | PE 34:1         | LMGP02010009 | C39H76NO8P | 6.793157774 | 1.241120276    |
| 2.61E-02                | 773.5985924 | 774.6064124        | 0.564948553 | PE 38:1         | LMGP02010135 | C43H84NO8P | 6.699126354 | 1.720397124    |

|             |             |             |             |                   |              |             |             |             |
|-------------|-------------|-------------|-------------|-------------------|--------------|-------------|-------------|-------------|
| 1.32E-02    | 704.5880253 | 705.5958453 | 0.41755266  | SM(d18:0/16:0)    | LMSP03010004 | C39H81N2O6P | 6.869735332 | 1.826860316 |
| 6.76E-04    | 730.6036905 | 731.6115105 | 0.436458594 | SM(d18:1/18:0)    | LMSP03010001 | C41H83N2O6P | 6.645918071 | 1.59231592  |
| 6.76E-04    | 730.6036905 | 731.6115105 | 0.436458594 | SM(d18:0/18:1)    | LMSP03010031 | C41H83N2O6P | 6.645918071 | 1.59231592  |
| 2.83E-02    | 758.6351933 | 759.6430133 | 0.516324213 | SM(d18:1/20:0)    | LMSP03010005 | C43H87N2O6P | 6.667676074 | 1.575489046 |
| 2.73E-02    | 786.6668188 | 787.6746388 | 0.647287175 | SM(d18:1/22:0)    | LMSP03010006 | C45H91N2O6P | 6.843859074 | 2.223605831 |
| 1.49E-02    | 812.6824056 | 813.6902256 | 0.596711373 | SM(d18:1/24:1)    | LMSP03010007 | C47H93N2O6P | 6.547003845 | 1.804907249 |
| 3.98E-02    | 814.6988949 | 815.7067149 | 0.786144633 | SM(d18:1/24:0)    | LMSP03010008 | C47H95N2O6P | 7.561010103 | 2.964080988 |
| 3.98E-02    | 814.6988949 | 815.7067149 | 0.786144633 | SM(d18:0/24:1)    | LMSP03010023 | C47H95N2O6P | 7.561010103 | 2.964080988 |
| 2.03E-02    | 539.5305375 | 540.5383575 | 0.405250914 | Cer(d18:0/16:0)   | LMSP02020001 | C34H69NO3   | 5.212892442 | 2.992163729 |
| 1.90E-02    | 565.546695  | 566.554515  | 0.436733191 | Cer(d18:1/18:0)   | LMSP02010006 | C36H71NO3   | 5.870460422 | 1.545681792 |
| 1.24E-02    | 593.578296  | 594.586116  | 0.509251945 | Cer(d18:1/20:0)   | LMSP02010007 | C38H75NO3   | 6.100327646 | 1.976746158 |
| 1.86E-02    | 621.6099393 | 622.6177593 | 0.627423975 | Cer(d18:1/22:0)   | LMSP02010008 | C40H79NO3   | 6.3775127   | 1.880107083 |
| 0.010297163 | 647.6259132 | 648.6337332 | 0.584752798 | Cer(d18:1/24:1)   | LMSP02010009 | C42H81NO3   | 6.621458942 | 2.220459657 |
| 5.91E-03    | 658.5091829 | 659.5170029 | 0.365175089 | CER-PE d18:1/16:1 |              |             | 6.428045833 | 0.630084333 |
| 3.56E-02    | 686.5409151 | 687.5487351 | 0.413428042 | CER-PE d18:1/18:1 |              |             | 6.795125531 | 0.754138565 |

| Mock vs UV-DENV 36hr |             |             |             |                  |              |            |             |             |
|----------------------|-------------|-------------|-------------|------------------|--------------|------------|-------------|-------------|
| 4.92E-02             | 689.5401977 | 690.5480177 | 0.397908715 | PC O-30:1        | LMGP01020014 | C38H76NO7P | 6.232742922 | 1.080169664 |
| 1.05E-02             | 691.5560233 | 692.5638433 | 0.411461787 | PC O-30:0        | LMGP01020012 | C38H78NO7P | 6.468498263 | 1.3970845   |
| 1.03E-02             | 703.5194574 | 704.5272774 | 0.330359699 | PC 30:1          | LMGP01010485 | C38H74NO8P | 6.108468224 | 1.102093358 |
| 5.23E-03             | 715.5492994 | 716.5571194 | 0.237883988 | PC O-32:2 or P-3 | LMGP01020017 | C40H78NO7P | 3.145266054 | 0.971196157 |
| 1.55E-02             | 729.5355247 | 730.5433447 | 0.324204633 | PC 32:2          | LMGP01010494 | C40H76NO8P | 6.462646862 | 1.171126621 |
| 5.66E-02             | 743.5868644 | 744.5946844 | 0.436414521 | PC O-34:2 or p-3 | LMGP01020039 | C42H82NO7P | 5.398725912 | 1.062094499 |
| 6.42E-02             | 757.5668252 | 758.5746452 | 0.360999159 | PC 34:2          | LMGP01010585 | C42H80NO8P | 6.224176127 | 1.133395569 |
| 2.32E-02             | 777.535513  | 778.543333  | 0.2984784   | PC 36:6          | LMGP01010953 | C44H76NO8P | 6.048634909 | 1.159034312 |
| 3.97E-02             | 781.5666768 | 782.5744968 | 0.355787216 | PC 36:4          | LMGP01011056 | C44H80NO8P | 5.843169649 | 1.214038621 |
| 9.00E-03             | 783.5825143 | 784.5903343 | 0.363478216 | PC 36:3          | LMGP01010896 | C44H82NO8P | 6.067425905 | 1.137889404 |
| 3.53E-02             | 785.5982148 | 786.6060348 | 0.404637242 | PC 36:2          | LMGP01010966 | C44H84NO8P | 6.116140918 | 1.069683304 |

|          |             |             |             |                     |              |             |             |             |
|----------|-------------|-------------|-------------|---------------------|--------------|-------------|-------------|-------------|
| 2.67E-02 | 789.6299754 | 790.6377954 | 0.6093064   | PC 36:0             | LMGP01010006 | C44H88NO8P  | 6.668231038 | 1.568816859 |
| 1.29E-02 | 801.6664401 | 802.6742601 | 0.628307212 | PC O-38:1           | LMGP01020099 | C46H92NO7P  | 6.661293656 | 1.727539527 |
| 9.08E-03 | 803.5515391 | 804.5593591 | 0.30519687  | PC 38:7             | LMGP01010696 | C46H78NO8P  | 6.320854179 | 1.121240577 |
| 1.57E-02 | 817.7218972 | 818.7297172 | 0.813940313 | PC O2-40:0          | LMGP01040072 | C48H100NO6P | 8.429200591 | 1.065196628 |
| 1.75E-02 | 853.5735849 | 854.5814049 | 0.372140982 | PC 42:10            | LMGP01011058 | C50H80NO8P  | 13.44354425 | 0.946628564 |
| 5.46E-03 | 607.4250596 | 608.4328796 | 0.303505944 | PE 26:0             | LMGP02010058 | C31H62NO8P  | 6.255296366 | 0.860069833 |
| 5.65E-02 | 635.4567044 | 636.4645244 | 0.340256167 | PE 28:0             | LMGP02010016 | C33H66NO8P  | 6.521966014 | 0.862246615 |
| 4.44E-02 | 687.4886148 | 688.4964348 | 0.328023921 | PE 32:2             | LMGP02010019 | C37H70NO8P  | 6.916235095 | 1.163696444 |
| 4.41E-02 | 703.5558784 | 704.5636984 | 0.46124096  | PE O-34:1           | LMGP02020018 | C39H78NO7P  | 6.152214433 | 1.398798481 |
| 2.08E-02 | 713.5037658 | 714.5115858 | 0.331687984 | PE 34:3             | LMGP02010041 | C39H72NO8P  | 5.964685246 | 1.297290184 |
| 4.45E-04 | 719.5510601 | 720.5588801 | 0.388924075 | PE 34:0             | LMGP02010024 | C39H78NO8P  | 6.39305487  | 0.847787849 |
| 2.12E-03 | 735.4878162 | 736.4956362 | 0.299669066 | PE 36:6             | LMGP02010029 | C41H70NO8P  | 5.37904394  | 1.241323262 |
| 1.37E-03 | 739.5199057 | 740.5277257 | 0.358025563 | PE 36:4             | LMGP02010012 | C41H74NO8P  | 6.417312662 | 1.062074505 |
| 2.26E-04 | 747.5824683 | 748.5902883 | 0.445956792 | PE 36:0             | LMGP02010097 | C41H82NO8P  | 6.298073929 | 1.059968845 |
| 1.00E-02 | 767.5511584 | 768.5589784 | 0.401985333 | PE 38:4             | LMGP02010027 | C43H78NO8P  | 6.121323262 | 1.032409809 |
| 3.58E-03 | 785.5257681 | 786.5335881 | 0.305682618 | PS 36:3             | LMGP03010018 | C42H76NO10P | 6.541012169 | 0.859117154 |
| 1.26E-03 | 702.5721519 | 703.5799719 | 0.399650504 | SM(d18:1/16:0)      | LMSP03010003 | C39H79N2O6P | 6.571467895 | 1.068805993 |
| 5.92E-02 | 728.5879586 | 729.5957786 | 0.412634798 | SM(d18:1/18:1)      | LMSP03010029 | C41H81N2O6P | 6.551894277 | 1.263406718 |
| 8.60E-02 | 730.6036905 | 731.6115105 | 0.436458594 | SM(d18:1/18:0)      | LMSP03010001 | C41H83N2O6P | 6.645918071 | 1.072660429 |
| 8.60E-02 | 730.6036905 | 731.6115105 | 0.436458594 | SM(d18:0/18:1)      | LMSP03010031 | C41H83N2O6P | 6.645918071 | 1.072660429 |
| 5.33E-02 | 814.6988949 | 815.7067149 | 0.786144633 | SM(d18:1/24:0)      | LMSP03010008 | C47H95N2O6P | 7.561010103 | 1.300071909 |
| 5.33E-02 | 814.6988949 | 815.7067149 | 0.786144633 | SM(d18:0/24:1)      | LMSP03010023 | C47H95N2O6P | 7.561010103 | 1.300071909 |
| 4.33E-02 | 632.4933509 | 633.5011709 | 0.343500327 | CER-PE (d18:1/14:0) |              |             | 6.404693328 | 2.009538877 |

|                         |             |             |             |                 |              |            |             |             |
|-------------------------|-------------|-------------|-------------|-----------------|--------------|------------|-------------|-------------|
| <b>Mock vs Den 60hr</b> |             |             |             |                 |              |            |             |             |
| 9.61E-02                | 493.319547  | 494.327367  | 0.202519899 | LPC 16:1        | LMGP01050021 | C24H48NO7P | 5.568429861 | 1.463380564 |
| 2.07E-02                | 495.3351819 | 496.3430019 | 0.225881771 | LPC 16:0        | LMGP01050018 | C24H50NO7P | 5.515285744 | 1.774327424 |
| 1.12E-02                | 507.3713078 | 508.3791278 | 0.259450505 | LPC p-18:0 or O | LMGP01070009 | C26H54NO6P | 4.863917146 | 1.908240913 |
| 6.71E-02                | 689.5401977 | 690.5480177 | 0.397908715 | PC O-30:1       | LMGP01020014 | C38H76NO7P | 6.232742922 | 1.58485063  |

|             |             |             |             |                  |              |             |             |             |
|-------------|-------------|-------------|-------------|------------------|--------------|-------------|-------------|-------------|
| 4.42E-02    | 705.5350823 | 706.5429023 | 0.379901525 | PC 30:0          | LMGP01010438 | C38H76NO8P  | 6.055440726 | 0.682470041 |
| 2.08E-02    | 717.5716173 | 718.5794373 | 0.398614135 | PC O-32:1        | LMGP01020016 | C40H80NO7P  | 6.155939123 | 1.492060267 |
| 2.14E-02    | 739.5413238 | 740.5491438 | 0.392680143 | PC O-34:4        | LMGP01020021 | C42H78NO7P  | 13.82756888 | 0.341994588 |
| 7.02E-02    | 743.5868644 | 744.5946844 | 0.436414521 | PC O-34:2 or p-3 | LMGP01020039 | C42H82NO7P  | 5.398725912 | 1.583762111 |
| 4.59E-02    | 745.6029093 | 746.6107293 | 0.453108572 | PC (16:0e/18:1;1 | LMGP01020003 | C42H84NO7P  | 5.913772627 | 1.550191793 |
| 7.13E-02    | 765.5565897 | 766.5644097 | 0.375664212 | PC O-36:5 or p-3 | LMGP01020058 | C44H80NO7P  | 13.85939732 | 0.374609824 |
| 9.38E-02    | 769.5663687 | 770.5741887 | 0.345663763 | PC 35:3          | LMGP01010611 | C43H80NO8P  | 5.5339263   | 3.194431883 |
| 1.33E-02    | 771.618765  | 772.626585  | 0.437848068 | PC O-36:2 or p-3 | LMGP01030013 | C44H86NO7P  | 5.980968597 | 1.942078446 |
| 1.49E-02    | 773.6346917 | 774.6425117 | 0.524861954 | PC (16:0p/20:0;1 | LMGP01020052 | C44H88NO7P  | 6.32305012  | 1.575430327 |
| 5.30E-02    | 785.5982148 | 786.6060348 | 0.404637242 | PC 36:2          | LMGP01010966 | C44H84NO8P  | 6.116140918 | 0.7202355   |
| 0.034365927 | 795.6119863 | 796.6198063 | 0.284435598 | PC O-38:4        | LMGP01020062 | C46H86NO7P  | 2.719534337 | 3.228350963 |
| 1.69E-02    | 801.6664401 | 802.6742601 | 0.628307212 | PC O-38:1        | LMGP01020099 | C46H92NO7P  | 6.661293656 | 2.102668773 |
| 0.035802206 | 803.5515391 | 804.5593591 | 0.30519687  | PC 38:7          | LMGP01010696 | C46H78NO8P  | 6.320854179 | 1.933601926 |
| 7.09E-02    | 851.5575277 | 852.5653477 | 0.32637625  | PC 42:11         | LMGP01011059 | C50H78NO8P  | 12.99717692 | 1.500993745 |
| 4.99E-02    | 853.5735849 | 854.5814049 | 0.372140982 | PC 42:10         | LMGP01011058 | C50H80NO8P  | 13.44354425 | 1.786501809 |
| 2.87E-02    | 481.3194539 | 482.3272739 | 0.247755053 | LPE 18:0         | LMGP02050001 | C23H48NO7P  | 5.513832054 | 0.521291677 |
| 1.06E-02    | 663.4881255 | 664.4959455 | 0.383211376 | PE 30:0          | LMGP02010302 | C35H70NO8P  | 6.428943125 | 0.542125534 |
| 4.91E-02    | 691.5195301 | 692.5273501 | 0.444906928 | PE 32:0          | LMGP02010017 | C37H74NO8P  | 6.319601149 | 0.622835939 |
| 5.20E-02    | 767.5511584 | 768.5589784 | 0.401985333 | PE 38:4          | LMGP02010027 | C43H78NO8P  | 6.121323262 | 0.576192214 |
| 9.73E-02    | 785.5257681 | 786.5335881 | 0.305682618 | PS 36:3          | LMGP03010018 | C42H76NO10P | 6.541012169 | 0.527461432 |
| 4.41E-03    | 732.6194417 | 733.6272617 | 0.483677031 | SM(d18:0/18:0)   | LMSP03010020 | C41H85N2O6P | 6.765768493 | 2.746166783 |
| 8.88E-03    | 786.6668188 | 787.6746388 | 0.647287175 | SM(d18:1/22:0)   | LMSP03010006 | C45H91N2O6P | 6.843859074 | 1.6747704   |
| 7.40E-02    | 812.6824056 | 813.6902256 | 0.596711373 | SM(d18:1/24:1)   | LMSP03010007 | C47H93N2O6P | 6.547003845 | 1.518229184 |
| 6.13E-02    | 539.5305375 | 540.5383575 | 0.405250914 | Cer(d18:0/16:0)  | LMSP02020001 | C34H69NO3   | 5.212892442 | 2.078336797 |
| 8.57E-03    | 567.5621921 | 568.5700121 | 0.464764162 | Cer(d18:0/18:0)  | LMSP02020008 | C36H73NO3   | 5.58021256  | 2.400963331 |
| 4.50E-03    | 595.5938251 | 596.6016451 | 0.549369722 | Cer(d18:0/20:0)  | LMSP02020009 | C38H77NO3   | 5.876690492 | 2.876748293 |

|                            |             |             |             |          |              |            |             |             |
|----------------------------|-------------|-------------|-------------|----------|--------------|------------|-------------|-------------|
| <b>Mock vs UV-Den 60hr</b> |             |             |             |          |              |            |             |             |
| 2.22E-02                   | 495.3351819 | 496.3430019 | 0.225881771 | LPC 16:0 | LMGP01050018 | C24H50NO7P | 5.515285744 | 0.964100363 |

|             |             |             |             |                  |              |             |             |             |
|-------------|-------------|-------------|-------------|------------------|--------------|-------------|-------------|-------------|
| 1.46E-03    | 507.3713078 | 508.3791278 | 0.259450505 | LPC p-18:0 or O- | LMGP01070009 | C26H54NO6P  | 4.863917146 | 2.232692095 |
| 9.74E-02    | 691.5560233 | 692.5638433 | 0.411461787 | PC O-30:0        | LMGP01020012 | C38H78NO7P  | 6.468498263 | 0.841738911 |
| 8.83E-02    | 705.5350823 | 706.5429023 | 0.379901525 | PC 30:0          | LMGP01010438 | C38H76NO8P  | 6.055440726 | 0.825708518 |
| 1.09E-02    | 717.5716173 | 718.5794373 | 0.398614135 | PC O-32:1        | LMGP01020016 | C40H80NO7P  | 6.155939123 | 1.452384463 |
| 6.56E-02    | 719.5876173 | 720.5954373 | 0.486556448 | PC O-32:0        | LMGP01020015 | C40H82NO7P  | 6.625088411 | 1.482570491 |
| 5.18E-02    | 739.5413238 | 740.5491438 | 0.392680143 | PC O-34:4        | LMGP01020021 | C42H78NO7P  | 13.82756888 | 0.680247391 |
| 7.11E-02    | 745.6029093 | 746.6107293 | 0.453108572 | PC (16:0e/18:1;  | LMGP01020003 | C42H84NO7P  | 5.913772627 | 1.560881376 |
| 8.06E-02    | 759.5760449 | 760.5838649 | 0.414978015 | PC 34:1          | LMGP01010005 | C42H82NO8P  | 2.257965004 | 1.01916648  |
| 4.95E-02    | 773.6346917 | 774.6425117 | 0.524861954 | PC (16:0p/20:0;  | LMGP01020052 | C44H88NO7P  | 6.32305012  | 1.391308049 |
| 0.043896138 | 813.6297323 | 814.6375523 | 0.462990088 | PC 38:2          | LMGP01010640 | C46H88NO8P  | 6.172747629 | 1.887402496 |
| 2.31E-02    | 815.6453964 | 816.6532164 | 0.557540948 | PC 38:1          | LMGP01010786 | C46H90NO8P  | 6.174780267 | 1.40550688  |
| 8.83E-02    | 877.5737285 | 878.5815485 | 0.340678093 | PC 44:12         | LMGP01011119 | C52H80NO8P  | 13.23951874 | 0.662496092 |
| 9.51E-02    | 425.2569868 | 426.2648068 | 0.205633213 | LPE 14:0         | LMGP02050003 | C19H40NO7P  | 6.553256852 | 0.849512707 |
| 4.18E-03    | 453.288309  | 454.296129  | 0.225708132 | LPE 16:0         | LMGP02050002 | C21H44NO7P  | 6.196977402 | 0.836609199 |
| 1.63E-03    | 481.3194539 | 482.3272739 | 0.247755053 | LPE 18:0         | LMGP02050001 | C23H48NO7P  | 5.513832054 | 0.637258779 |
| 7.28E-02    | 579.3935371 | 580.4013571 | 0.275257901 | PE 24:0          | LMGP02010015 | C29H58NO8P  | 6.173907466 | 0.727753316 |
| 2.68E-02    | 607.4250596 | 608.4328796 | 0.303505944 | PE 26:0          | LMGP02010058 | C31H62NO8P  | 6.255296366 | 0.641856227 |
| 3.43E-02    | 635.4567044 | 636.4645244 | 0.340256167 | PE 28:0          | LMGP02010016 | C33H66NO8P  | 6.521966014 | 0.711682714 |
| 0.018784442 | 663.4881255 | 664.4959455 | 0.383211376 | PE 30:0          | LMGP02010302 | C35H70NO8P  | 6.428943125 | 0.650405652 |
| 9.19E-04    | 691.5195301 | 692.5273501 | 0.444906928 | PE 32:0          | LMGP02010017 | C37H74NO8P  | 6.319601149 | 0.667277452 |
| 7.68E-02    | 717.5356843 | 718.5435043 | 0.42173318  | PE 34:1          | LMGP02010009 | C39H76NO8P  | 6.793157774 | 0.995917799 |
| 1.75E-02    | 739.5199057 | 740.5277257 | 0.358025563 | PE 36:4          | LMGP02010012 | C41H74NO8P  | 6.417312662 | 0.777587508 |
| 6.02E-02    | 745.5668685 | 746.5746885 | 0.482835154 | PE 36:1          | LMGP02010026 | C41H80NO8P  | 6.382432713 | 0.950669697 |
| 6.71E-02    | 763.51965   | 764.52747   | 0.328266645 | PE 38:6          | LMGP02010095 | C43H74NO8P  | 5.880695283 | 0.655396547 |
| 8.36E-03    | 767.5511584 | 768.5589784 | 0.401985333 | PE 38:4          | LMGP02010027 | C43H78NO8P  | 6.121323262 | 0.614331239 |
| 4.61E-02    | 787.5414408 | 788.5492608 | 0.411520119 | PS 36:2          | LMGP03010013 | C42H78NO10P | 6.553094925 | 0.673700855 |
| 0.025410831 | 704.5880253 | 705.5958453 | 0.41755266  | SM(d18:0/16:0)   | LMSP03010004 | C39H81N2O6P | 6.869735332 | 0.756099322 |
| 0.07807743  | 539.5305375 | 540.5383575 | 0.405250914 | Cer(d18:0/16:0)  | LMSP02020001 | C34H69NO3   | 5.212892442 | 0.628969109 |
| 9.74E-03    | 621.6099393 | 622.6177593 | 0.627423975 | Cer(d18:1/22:0)  | LMSP02010008 | C40H79NO3   | 6.3775127   | 1.991728417 |

|          |             |             |             |                   |              |             |             |             |
|----------|-------------|-------------|-------------|-------------------|--------------|-------------|-------------|-------------|
| 5.32E-02 | 647.6259132 | 648.6337332 | 0.584752798 | Cer(d18:1/24:1)   | LMSP02010009 | C42H81NO3   | 6.621458942 | 1.789645524 |
| 5.31E-03 | 649.6413634 | 650.6491834 | 0.760703851 | Cer(d18:1/24:0)   | LMSP02010012 | C42H83NO3   | 6.29335809  | 2.000220433 |
| 3.40E-02 | 688.5563818 | 689.5642018 | 0.437363244 | CER-PE d18:1/18:0 |              |             | 6.509022777 | 0.948604845 |
| 3.40E-02 | 688.5563818 | 689.5642018 | 0.437363244 | Etn-1-P-Cer(d14   | LMSP03020001 | C38H77N2O6P | 6.530807769 | 0.948604845 |
