# Supplementary material for: Dengue Virus Infection Perturbs Lipid Homeostasis in Infected Mosquito Cells
Source: PubMed Central journal article supplement (PMC3310792; doi:10.1371/journal.ppat.1002584), 2012-03-22
Supplement: ppat.1002584.s005.pdf [file ppat.1002584.s005.pdf]

| p.ttest    | p.wilcox   | Exact Mass | M/Z        | RT      | ID (Total carbon/double bond)       | Formula     | PPM Error    | Fold DENV/Mock  |
|------------|------------|------------|------------|---------|-------------------------------------|-------------|--------------|-----------------|
| 0.0119212  | 0.0119212  | 884.54     | 883.532532 | 20.745  | PI (38:5)                           | C47H81O13P  | 0.53361069   | 0.287375        |
| 0.01092014 | 0.01092014 | 884.54     | 883.532532 | 20.745  | PI (38:5)                           | C47H81O13P  | 0.53361069   |                 |
| 0.00858658 | 0.2        | 836.54     | 835.532593 | 21.0543 | PI (34:1)                           | C43H81O13P  | 0.637148254  | 3.27101         |
| 0.01196713 | 0.01196713 | 836.54     | 835.532593 | 21.0543 | PI (34:1)                           | C43H81O13P  | 0.637148254  |                 |
| 0.01059142 | 0.01059142 | 856.51     | 855.500183 | 19.8827 | PI (36:5)                           | C45H77O13P  | -2.191451355 | 0.1             |
| 0.01080327 | 0.01080327 | 786.58     | 785.579041 | 28.5617 | PG (O-38:3)                         | C44H83O9P   | 8.875130311  | 0.127265        |
| 0.00957995 | 0.00957995 | 437.290619 | 436.28244  | 23.5048 | PE(P-16:0e/0:0)                     | C21H44NO6P  | -0.546547284 | 10.51758        |
| 0.00839554 | 0.00839554 | 437.290619 | 436.282623 | 23.5593 | PE(P-16:0e/0:0)                     | C21H44NO6P  | -0.546547284 |                 |
| 0.01339142 | 0.2        | 717.53     | 716.521912 | 22.1253 | PC (31:1)                           | C39H76NO8P  | -0.206263153 | 1.970255        |
| 0.01721421 | 0.1        | 717.53     | 716.521912 | 22.1253 | PC (31:1)                           | C39H76NO8P  | -0.206263153 |                 |
| 0.01212817 | 0.01212817 | 745.562134 | 744.554199 | 22.9715 | PC (33:1)                           | C41H80NO8P  | 0.006706349  | 0.1             |
| 0.01360544 | 0.1        | 745.562134 | 744.554199 | 22.9715 | PC (33:1)                           | C41H80NO8P  | 0.006706349  |                 |
| 0.00954852 | 0.00954852 | 661.468262 | 660.4599   | 19.7488 | PE (30:1)                           | C35H68NO8P  |              | Not significant |
| 0.0024705  | 0.2        | 689.499573 | 688.490845 | 21.111  | PC (29:1)                           | C37H72NO8P  | -1.142857851 | Not significant |
| 0.0107848  | 0.0107848  | 256.240234 | 255.232941 | 8.59932 | Palmitic acid                       | C16H32O2    | 2.524974279  | 10.384106       |
| 0.0096012  | 0.0096012  | 256.240234 | 255.232605 | 8.57512 | Palmitic acid                       | C16H32O2    | 2.524974279  |                 |
| 0.01086703 | 0.01086703 | 282.25589  | 281.24823  | 8.9167  | Oleic acid                          | C18H34O2    | 0.992007642  | 0.145958        |
| 0.03288563 | 0.2        | 282.25589  | 281.24823  | 8.9167  | Oleic acid                          | C18H34O2    | 0.992007642  |                 |
| 0.01046164 | 0.01046164 | 284.271515 | 283.263794 | 11.4335 | Stearic acid                        | C18H36O2    | 0.770390238  | 2.4             |
| 0.00880594 | 0.00880594 | 284.271515 | 283.264069 | 11.0419 | Stearic acid                        | C18H36O2    | 0.770390238  |                 |
| 0.00880971 | 0.00880971 | 358.31     | 357.300385 | 32.1102 | MG (18:0)[rac]                      | C21H42O4    | -4.674723005 | 10.415623       |
| 0.00903598 | 0.00903598 | 358.308319 | 357.300598 | 30.5262 | MG (18:0)                           | C21H42O4    | 0.611205457  | 10.299662       |
| 0.01165203 | 0.1        | 358.308319 | 357.300598 | 22.7758 | MG (18:0)                           | C21H42O4    | 0.611205457  |                 |
| 0.01097097 | 0.1        | 330.277008 | 329.269653 | 20.9483 | MG (16:0)                           | C19H38O4    | 1.771240461  | 1.665827        |
| 0.01060442 | 0.01060442 | 330.277008 | 329.269257 | 21.0968 | MG (16:0)                           | C19H38O4    | 1.771240461  |                 |
| 0.01040695 | 0.01040695 | 625.57     | 624.556091 | 28.912  | DG (36:2)                           | C39H67D5O5  | -9.541697972 | 10.290444       |
| 0.01039105 | 0.01039105 | 606.43     | 605.426941 | 22.8297 | PA (29:0)                           | C32H63O8P   | 8.04874429   | 9.613046        |
| 0.01554847 | 0.1        | 537.512085 | 536.504822 | 27.7823 | N-Palmitoylsphingosine              | C34H67NO3   | 1.259506565  | 2.751471        |
| 0.00041734 | 0.1        | 537.512085 | 536.503784 | 27.6613 | N-Palmitoylsphingosine              | C34H67NO3   | 1.259506565  |                 |
| 0.00140161 | 0.1        | 565.543396 | 564.535461 | 28.781  | N-Stearoylsphingosine               | C36H71NO3   | 0.008841055  | Not significant |
| 0.01055958 | 0.01055958 | 643.502319 | 642.493896 | 24.8293 | Glucosylceramide (d30:1)            | C36H69NO8   | -0.750580046 | 10.051282       |
| 0.01060669 | 0.01060669 | 643.502319 | 642.494263 | 24.8048 | Glucosylceramide (d30:1)            | C36H69NO8   | -0.750580046 |                 |
| 0.01151822 | 0.01151822 | 744.61     | 743.605225 | 23.2883 | SM (37:1)                           | C42H85N2O6P | 4.250547266  | 0.1             |
| 0.00962493 | 0.00962493 | 744.61     | 743.605225 | 23.2883 | SM (37:1)                           | C42H85N2O6P | 4.250547266  |                 |
| 0.01041732 | 0.01041732 | 647.621643 | 646.613281 | 31.8368 | Ceramide (d42:2)                    | C42H81NO3   | -0.651615036 | 10.126068       |
| 0.01022029 | 0.01022029 | 647.621643 | 646.613403 | 31.6768 | Ceramide (d42:2)                    | C42H81NO3   | -0.651615036 |                 |
| 0.01930831 | 0.1        | 593.574707 | 592.566956 | 30.2087 | Ceramide (d38:1)                    | C44H85NO11S | 0.318409794  | 1.723543        |
| 0.00507216 | 0.2        | 593.574707 | 592.566833 | 29.951  | Ceramide (d38:1)                    | C44H85NO11S | 0.318409794  |                 |
| 0.00911912 | 0.00911912 | 619.59     | 618.58252  | 30.2993 | Ceramide (d40:2)                    | C40H77NO3   | 0.742426443  | 9.700063        |
| 0.00973599 | 0.00973599 | 635.621643 | 634.613159 | 32.637  | Ceramide (d41:1)                    | C41H81NO3   | -0.855855061 | 8.679758        |
| 0.00287013 | 0.1        | 563.53     | 562.519958 | 28.3715 | Ceramide (d36:2)                    | C36H69NO3   | -3.730058737 | 3.867952        |
| 0.01042826 | 0.01042826 | 563.527771 | 562.520203 | 28.2683 | Ceramide (d36:2)                    | C36H69NO3   | -3.730058737 |                 |
| 0.00169133 | 0.1        | 565.54     | 564.536011 | 28.9343 | Ceramide (d36:1)                    | C36H71NO3   | 6.986243237  | 2.109351        |
| 0.00941673 | 0.00941673 | 835.584351 | 834.584167 | 31.0092 | 3-O-Sulfogalactosylceramide (d38:1) | C44H85NO11S | 9.282126922  | 0.151782        |
| 0.01122649 | 0.2        | 835.584351 | 834.584167 | 31.0092 | 3-O-Sulfogalactosylceramide (d38:1) | C44H85NO11S | 9.282126922  |                 |
| 0.0157015  | 0.33333333 | 807.55304  | 806.553223 | 29.002  | 3-O-Sulfogalactosylceramide (36:1)  | C42H81NO11S | 10.05878202  | 2.66352         |
| 0.01888464 | 0.2        | 807.55304  | 806.553223 | 29.002  | 3-O-Sulfogalactosylceramide (36:1)  | C42H81NO11S | 10.05878202  |                 |

| Fold UV-DENV/Mock | ID           | ID URL                                                                                                                                      |
|-------------------|--------------|---------------------------------------------------------------------------------------------------------------------------------------------|
|                   | LMGP06010327 | <a href="http://www.lipidmaps.org/data/LMSDRecord.php?LMID=LMGP06010193">http://www.lipidmaps.org/data/LMSDRecord.php?LMID=LMGP06010193</a> |
| 0.1               | LMGP06010327 | <a href="http://www.lipidmaps.org/data/LMSDRecord.php?LMID=LMGP06010193">http://www.lipidmaps.org/data/LMSDRecord.php?LMID=LMGP06010193</a> |
|                   | LMGP06010033 | <a href="http://www.lipidmaps.org/data/LMSDRecord.php?LMID=LMGP06010001">http://www.lipidmaps.org/data/LMSDRecord.php?LMID=LMGP06010001</a> |
| 0.116134          | LMGP06010033 | <a href="http://www.lipidmaps.org/data/LMSDRecord.php?LMID=LMGP06010001">http://www.lipidmaps.org/data/LMSDRecord.php?LMID=LMGP06010001</a> |
| Not significant   | LMGP06010299 | <a href="http://www.lipidmaps.org/data/LMSDRecord.php?LMID=LMGP06010105">http://www.lipidmaps.org/data/LMSDRecord.php?LMID=LMGP06010105</a> |
| Not significant   | LMGP04020054 | <a href="http://www.lipidmaps.org/data/LMSDRecord.php?LMID=LMGP04020036">http://www.lipidmaps.org/data/LMSDRecord.php?LMID=LMGP04020036</a> |
|                   | HMDB11152    | <a href="http://www.hmdb.ca/metabolites/HMDB11152">http://www.hmdb.ca/metabolites/HMDB11152</a>                                             |
| 0.1               | HMDB11152    | <a href="http://www.hmdb.ca/metabolites/HMDB11152">http://www.hmdb.ca/metabolites/HMDB11152</a>                                             |
|                   | LMGP01010008 | <a href="http://www.lipidmaps.org/data/LMSDRecord.php?LMID=LMGP01010002">http://www.lipidmaps.org/data/LMSDRecord.php?LMID=LMGP01010002</a> |
| 0.517361          | LMGP01010008 | <a href="http://www.lipidmaps.org/data/LMSDRecord.php?LMID=LMGP01010002">http://www.lipidmaps.org/data/LMSDRecord.php?LMID=LMGP01010002</a> |
|                   | HMDB07939    | <a href="http://www.hmdb.ca/metabolites/HMDB07938">http://www.hmdb.ca/metabolites/HMDB07938</a>                                             |
| 0.51547           | HMDB07939    | <a href="http://www.hmdb.ca/metabolites/HMDB07938">http://www.hmdb.ca/metabolites/HMDB07938</a>                                             |
| 0.1               | HMDB08857    | <a href="http://www.hmdb.ca/metabolites/HMDB08825">http://www.hmdb.ca/metabolites/HMDB08825</a>                                             |
| 0.430265          | HMDB07933    | <a href="http://www.hmdb.ca/metabolites/HMDB07901">http://www.hmdb.ca/metabolites/HMDB07901</a>                                             |
|                   |              |                                                                                                                                             |
|                   | HMDB02396    | <a href="http://www.hmdb.ca/metabolites/HMDB00220">http://www.hmdb.ca/metabolites/HMDB00220</a>                                             |
| 10.698328         | HMDB02396    | <a href="http://www.hmdb.ca/metabolites/HMDB00220">http://www.hmdb.ca/metabolites/HMDB00220</a>                                             |
|                   | HMDB00573    | <a href="http://www.hmdb.ca/metabolites/HMDB00207">http://www.hmdb.ca/metabolites/HMDB00207</a>                                             |
| 2.526458          | HMDB00573    | <a href="http://www.hmdb.ca/metabolites/HMDB00207">http://www.hmdb.ca/metabolites/HMDB00207</a>                                             |
|                   | HMDB00827    | <a href="http://www.hmdb.ca/metabolites/HMDB00827">http://www.hmdb.ca/metabolites/HMDB00827</a>                                             |
| 0.1               | HMDB00827    | <a href="http://www.hmdb.ca/metabolites/HMDB00827">http://www.hmdb.ca/metabolites/HMDB00827</a>                                             |
| Not Observed      | LMGL01010003 | <a href="http://www.lipidmaps.org/data/LMSDRecord.php?LMID=LMGL01010003">http://www.lipidmaps.org/data/LMSDRecord.php?LMID=LMGL01010003</a> |
|                   | HMDB11535    | <a href="http://www.hmdb.ca/metabolites/HMDB11131">http://www.hmdb.ca/metabolites/HMDB11131</a>                                             |
| 0.54088           | HMDB11535    | <a href="http://www.hmdb.ca/metabolites/HMDB11131">http://www.hmdb.ca/metabolites/HMDB11131</a>                                             |
|                   | HMDB11564    | <a href="http://www.hmdb.ca/metabolites/HMDB11533">http://www.hmdb.ca/metabolites/HMDB11533</a>                                             |
| 0.1               | HMDB11564    | <a href="http://www.hmdb.ca/metabolites/HMDB11533">http://www.hmdb.ca/metabolites/HMDB11533</a>                                             |
| Not Observed      | LMGL02010319 | <a href="http://www.lipidmaps.org/data/LMSDRecord.php?LMID=LMGL02010319">http://www.lipidmaps.org/data/LMSDRecord.php?LMID=LMGL02010319</a> |
| Not observed      | LMGP10010070 | <a href="http://www.lipidmaps.org/data/LMSDRecord.php?LMID=LMGP10010048">http://www.lipidmaps.org/data/LMSDRecord.php?LMID=LMGP10010048</a> |
|                   |              |                                                                                                                                             |
|                   | HMDB04949    | <a href="http://www.hmdb.ca/metabolites/HMDB00790">http://www.hmdb.ca/metabolites/HMDB00790</a>                                             |
| 0.608542          | HMDB04949    | <a href="http://www.hmdb.ca/metabolites/HMDB00790">http://www.hmdb.ca/metabolites/HMDB00790</a>                                             |
| 0.508831          | HMDB04950    | <a href="http://www.hmdb.ca/metabolites/HMDB00829">http://www.hmdb.ca/metabolites/HMDB00829</a>                                             |
|                   | HMDB12320    | <a href="http://www.hmdb.ca/metabolites/HMDB04969">http://www.hmdb.ca/metabolites/HMDB04969</a>                                             |
| 0.1               |              |                                                                                                                                             |
|                   | LMSP03010056 | <a href="http://www.lipidmaps.org/data/LMSDRecord.php?LMID=LMSP03010055">http://www.lipidmaps.org/data/LMSDRecord.php?LMID=LMSP03010055</a> |
| 0.17148           | LMSP03010056 | <a href="http://www.lipidmaps.org/data/LMSDRecord.php?LMID=LMSP03010055">http://www.lipidmaps.org/data/LMSDRecord.php?LMID=LMSP03010055</a> |
|                   | LMSP02010009 | <a href="http://www.hmdb.ca/metabolites/HMDB04953">http://www.hmdb.ca/metabolites/HMDB04953</a>                                             |
| 0.1               | LMSP02010009 | <a href="http://www.hmdb.ca/metabolites/HMDB04953">http://www.hmdb.ca/metabolites/HMDB04953</a>                                             |
|                   | LMSP02010007 | <a href="http://www.hmdb.ca/metabolites/HMDB04951">http://www.hmdb.ca/metabolites/HMDB04951</a>                                             |
| 0.513978          | LMSP02010007 | <a href="http://www.hmdb.ca/metabolites/HMDB04951">http://www.hmdb.ca/metabolites/HMDB04951</a>                                             |
| Not observed      | HMDB11775    | <a href="http://www.lipidmaps.org/data/LMSDRecord.php?LMID=LMSP02010029">http://www.lipidmaps.org/data/LMSDRecord.php?LMID=LMSP02010029</a> |
| Not observed      | LMSP02010021 | <a href="http://www.hmdb.ca/metabolites/HMDB00950">http://www.hmdb.ca/metabolites/HMDB00950</a>                                             |
|                   | LMSP02010003 | <a href="http://www.lipidmaps.org/data/LMSDRecord.php?LMID=LMSP02010003">http://www.lipidmaps.org/data/LMSDRecord.php?LMID=LMSP02010003</a> |
| 0.124346          | LMSP02010003 | <a href="http://www.lipidmaps.org/data/LMSDRecord.php?LMID=LMSP02010003">http://www.lipidmaps.org/data/LMSDRecord.php?LMID=LMSP02010003</a> |
| Not significant   | LMSP02020015 | <a href="http://www.lipidmaps.org/data/LMSDRecord.php?LMID=LMSP02010006">http://www.lipidmaps.org/data/LMSDRecord.php?LMID=LMSP02010006</a> |
|                   | LMSP06020010 | <a href="http://www.lipidmaps.org/data/LMSDRecord.php?LMID=LMSP06020010">http://www.lipidmaps.org/data/LMSDRecord.php?LMID=LMSP06020010</a> |
| 0.51991           | LMSP06020010 | <a href="http://www.lipidmaps.org/data/LMSDRecord.php?LMID=LMSP06020010">http://www.lipidmaps.org/data/LMSDRecord.php?LMID=LMSP06020010</a> |
|                   | LMSP06020001 | <a href="http://www.lipidmaps.org/data/LMSDRecord.php?LMID=LMSP06020001">http://www.lipidmaps.org/data/LMSDRecord.php?LMID=LMSP06020001</a> |
| 0.45522           | LMSP06020001 | <a href="http://www.lipidmaps.org/data/LMSDRecord.php?LMID=LMSP06020001">http://www.lipidmaps.org/data/LMSDRecord.php?LMID=LMSP06020001</a> |
