# Supplementary material for: Dengue Virus Infection Perturbs Lipid Homeostasis in Infected Mosquito Cells
Source: PubMed Central journal article supplement (PMC3310792; doi:10.1371/journal.ppat.1002584), 2012-03-22
Supplement: ppat.1002584.s006.pdf [file ppat.1002584.s006.pdf]

Supplementary Table 3

| p.ttest     | p.wilcox    | Exact Mass | M/Z        | RT      | ID (total carbon:double bond)                                         | Formula    | PPM Error    |
|-------------|-------------|------------|------------|---------|-----------------------------------------------------------------------|------------|--------------|
| 2.58896E-05 | 0.2         | 836.54     | 835.532166 | 21.1125 | PI(16:0/18:1(9Z))                                                     | C43H81O13P | 0.126712411  |
| 0.006496139 | 0.2         | 834.525818 | 833.516357 | 20.3312 | PI(16:0/18:2(9Z,12Z))                                                 | C43H79O13P | -1.822591905 |
| 0.023782329 | 0.2         | 808.51     | 807.501404 | 20.0265 | PI(12:0/20:1(11Z))                                                    | C41H77O13P | -0.811369062 |
| 0.010137259 | 0.010137259 | 856.51     | 855.501282 | 19.6338 | PI(14:1(9Z)/22:4(7Z,10Z,13Z,16Z))                                     | C45H77O13P | -0.908337322 |
| 0.008944193 | 0.008944193 | 746.509766 | 745.50061  | 20.7662 | PG(16:0/18:2(9Z,12Z))                                                 | C40H75O10P | -1.62891372  |
| 0.016671195 | 0.2         | 720.494141 | 719.485596 | 20.526  | PG(16:0/16:1(9Z))                                                     | C38H73O10P | -0.839701485 |
| 0.00038947  | 0.1         | 537.512085 | 536.504822 | 27.7823 | N-Palmitoylsphingosine                                                | C34H67NO3  | 1.259506565  |
| 0.001637384 | 0.1         | 565.543396 | 564.536011 | 28.9343 | N-Stearoylsphingosine                                                 | C36H71NO3  | 0.981357052  |
| 0.040549168 | 0.2         | 643.502319 | 642.493896 | 24.8293 | Glucosylceramide (d30:1)                                              | C36H69NO8  | -0.750580046 |
| 0.00136728  | 0.1         | 563.527771 | 562.519958 | 28.3715 | Ceramide (d36:2)                                                      | C36H69NO3  | 0.225366     |
| 0.003623002 | 0.1         | 593.574707 | 592.566956 | 30.2087 | Ceramide (d38:1)                                                      | C38H75NO3  | 0.318409794  |
| 0.043730735 | 0.2         | 647.621643 | 646.613281 | 31.8368 | Ceramide (d42:2)                                                      | C42H81NO3  | -0.651615036 |
| 0.00974466  | 0.00974466  | 535.5      | 534.489258 | 27.3163 | Cer(d34:2)                                                            | C34H65NO3  | -5.232492997 |
| 0.011095035 | 0.011095035 | 619.59     | 618.58252  | 30.2993 | Cer(d40:2)                                                            | C40H77NO3  | 0.742426443  |
| 0.011482263 | 0.011482263 | 621.606018 | 620.597595 | 31.7678 | Ceramide (d40:1)                                                      | C40H79NO3  | -0.777019504 |
| 0.009868462 | 0.009868462 | 635.621643 | 634.613159 | 32.637  | Cer(d41:1)                                                            | C41H81NO3  | -0.855855061 |
| 0.010372965 | 0.010372965 | 625.57     | 624.556091 | 28.912  | DG(36:2)                                                              | C39H67D5O5 | -9.541697972 |
| 0.000909382 | 0.1         | 330.277008 | 329.269653 | 20.9483 | MG(16:0)                                                              | C19H38O4   | 1.771240461  |
| 0.001929538 | 0.1         | 358.308319 | 357.300385 | 32.1102 | MG(18:0)                                                              | C21H42O4   | 0.016745355  |
| 0.010049983 | 0.010049983 | 358.308319 | 357.300598 | 30.5262 | MG(18:0)                                                              | C21H42O4   | 0.611205457  |
| 0.011692959 | 0.011692959 | 606.43     | 605.426941 | 22.8297 | PA(29:0)                                                              | C32H63O8P  | 8.04874429   |
| 0.010553801 | 0.010553801 | 270.25589  | 269.248596 | 21.9505 | Heptadecanoic acid                                                    | C17H34O2   | 2.390327182  |
| 0.008276665 | 0.008276665 | 282.25589  | 281.248322 | 8.71102 | Oleic acid                                                            | C18H34O2   | 1.317953011  |
| 0.01234588  | 0.01234588  | 256.240234 | 255.232941 | 8.59932 | Palmitic acid                                                         | C16H32O2   | 2.524974279  |
| 0.011363529 | 0.011363529 | 284.271515 | 283.263763 | 11.7643 | Stearic acid                                                          | C18H36O2   | 0.661339565  |
| 0.011852027 | 0.011852027 | 785.64     | 784.632446 | 30.2037 | 1,2-dioctadecanoyl-3-O-(6-deoxy-6-amino-alpha-D-glucosyl)-sn-glycerol | C45H87NO9  | 0.491319179  |

| <b>Fold DENV/DENV C75</b> | <b>ID</b>    | <b>ID_url</b>                                                                                                                               |
|---------------------------|--------------|---------------------------------------------------------------------------------------------------------------------------------------------|
| 4.13392077                | LMGP06010001 | <a href="http://www.lipidmaps.org/data/LMSDRecord.php?LMID=LMGP06010001">http://www.lipidmaps.org/data/LMSDRecord.php?LMID=LMGP06010001</a> |
| 3.44683281                | HMDB09784    | <a href="http://www.hmdb.ca/metabolites/HMDB09784">http://www.hmdb.ca/metabolites/HMDB09784</a>                                             |
| 4.030520139               | LMGP06010027 | <a href="http://www.lipidmaps.org/data/LMSDRecord.php?LMID=LMGP06010027">http://www.lipidmaps.org/data/LMSDRecord.php?LMID=LMGP06010027</a> |
| 0.1                       | LMGP06010105 | <a href="http://www.lipidmaps.org/data/LMSDRecord.php?LMID=LMGP06010105">http://www.lipidmaps.org/data/LMSDRecord.php?LMID=LMGP06010105</a> |
| 0.1                       | HMDB10575    | <a href="http://www.hmdb.ca/metabolites/HMDB10575">http://www.hmdb.ca/metabolites/HMDB10575</a>                                             |
| 5.981845815               | HMDB10571    | <a href="http://www.hmdb.ca/metabolites/HMDB10571">http://www.hmdb.ca/metabolites/HMDB10571</a>                                             |
| 2.577369226               | HMDB00790    | <a href="http://www.hmdb.ca/metabolites/HMDB00790">http://www.hmdb.ca/metabolites/HMDB00790</a>                                             |
| 2.242037407               | HMDB00829    | <a href="http://www.hmdb.ca/metabolites/HMDB00829">http://www.hmdb.ca/metabolites/HMDB00829</a>                                             |
| 2.063881902               | HMDB04969    | <a href="http://www.hmdb.ca/metabolites/HMDB04969">http://www.hmdb.ca/metabolites/HMDB04969</a>                                             |
| 3.350611523               | HMDB04948    | <a href="http://www.hmdb.ca/metabolites/HMDB04948">http://www.hmdb.ca/metabolites/HMDB04948</a>                                             |
| 1.679866535               | HMDB04951    | <a href="http://www.hmdb.ca/metabolites/HMDB04951">http://www.hmdb.ca/metabolites/HMDB04951</a>                                             |
| 1.906851                  | HMDB04953    | <a href="http://www.hmdb.ca/metabolites/HMDB04953">http://www.hmdb.ca/metabolites/HMDB04953</a>                                             |
| 8.936502491               | LMSP02010024 | <a href="http://www.lipidmaps.org/data/LMSDRecord.php?LMID=LMSP02010024">http://www.lipidmaps.org/data/LMSDRecord.php?LMID=LMSP02010024</a> |
| 10.56264764               | LMSP02010029 | <a href="http://www.lipidmaps.org/data/LMSDRecord.php?LMID=LMSP02010029">http://www.lipidmaps.org/data/LMSDRecord.php?LMID=LMSP02010029</a> |
| 9.816951784               | HMDB04952    | <a href="http://www.hmdb.ca/metabolites/HMDB04952">http://www.hmdb.ca/metabolites/HMDB04952</a>                                             |
| 10.32217057               | HMDB00950    | <a href="http://www.hmdb.ca/metabolites/HMDB00950">http://www.hmdb.ca/metabolites/HMDB00950</a>                                             |
| 10.34760312               | LMGL02010319 | <a href="http://www.lipidmaps.org/data/LMSDRecord.php?LMID=LMGL02010319">http://www.lipidmaps.org/data/LMSDRecord.php?LMID=LMGL02010319</a> |
| 2.349551054               | HMDB11533    | <a href="http://www.hmdb.ca/metabolites/HMDB11533">http://www.hmdb.ca/metabolites/HMDB11533</a>                                             |
| 1.661877517               | HMDB11131    | <a href="http://www.hmdb.ca/metabolites/HMDB11131">http://www.hmdb.ca/metabolites/HMDB11131</a>                                             |
| 9.949724298               | HMDB11131    | <a href="http://www.hmdb.ca/metabolites/HMDB11131">http://www.hmdb.ca/metabolites/HMDB11131</a>                                             |
| 9.63516104                | LMGP10010048 | <a href="http://www.lipidmaps.org/data/LMSDRecord.php?LMID=LMGP10010048">http://www.lipidmaps.org/data/LMSDRecord.php?LMID=LMGP10010048</a> |
| 10.62041732               | HMDB02259    | <a href="http://www.hmdb.ca/metabolites/HMDB02259">http://www.hmdb.ca/metabolites/HMDB02259</a>                                             |
| 0.1                       | HMDB00207    | <a href="http://www.hmdb.ca/metabolites/HMDB00207">http://www.hmdb.ca/metabolites/HMDB00207</a>                                             |
| 9.802158788               | HMDB00220    | <a href="http://www.hmdb.ca/metabolites/HMDB00220">http://www.hmdb.ca/metabolites/HMDB00220</a>                                             |
| 10.89893964               | HMDB00827    | <a href="http://www.hmdb.ca/metabolites/HMDB00827">http://www.hmdb.ca/metabolites/HMDB00827</a>                                             |
| 0.1                       | LMGL05010003 | <a href="http://www.lipidmaps.org/data/LMSDRecord.php?LMID=LMGL05010003">http://www.lipidmaps.org/data/LMSDRecord.php?LMID=LMGL05010003</a> |
